# Supplementary material
Source: PubMed Central journal article supplement (PMC4232470)
Supplement: NIHMS626470-supplement-1.pdf [file NIHMS626470-supplement-1.pdf]

## **Supplementary Information**

### **Spatial encoding of cyclic AMP signalling specificity by GPCR endocytosis**

Nikoleta G. Tsvetanova<sup>1</sup> and Mark von Zastrow<sup>1,2,\*</sup>

*<sup>1</sup>Department of Psychiatry, University of California, San Francisco CA, USA and <sup>2</sup>Department of Cellular & Molecular Pharmacology, University of California, San Francisco CA, USA.*

\* To whom the correspondence should be addressed. Email: [mark.vonzastrow@ucsf.edu](mailto:mark.vonzastrow@ucsf.edu)

## Supplementary Results

### **Supplementary Table 1. Beta2-adrenoceptor transcriptional response target genes.**

Median-centered Log<sub>2</sub>(Iso/No Drug) for each gene are shown from four replicate oligonucleotide microarray experiments. Replicates #1 and #2: cells treated with 1 μM isoproterenol; Replicates #3 and #4- cells treated with 10 nM isoproterenol.

| Gene         | Description                                                                | Replicate #1 | Replicate #2 | Replicate #3 | Replicate #4 |
|--------------|----------------------------------------------------------------------------|--------------|--------------|--------------|--------------|
| C6orf176     | Chromosome 6 open reading frame 176                                        | 5.50         | 5.74         | 6.50         | 5.51         |
| PCK1         | Phosphoenolpyruvate carboxykinase 1                                        | 5.72         | 5.69         | 4.64         | 5.04         |
| CGA          | Glycoprotein hormones, alpha polypeptide                                   | 4.31         | 4.49         | 4.06         | 2.95         |
| NR4A1        | Nuclear receptor subfamily 4, group A, member 1                            | 4.33         | 4.07         | 3.87         | 3.45         |
| NR4A3        | Nuclear receptor subfamily 4, group A, member 3                            | 5.74         | 3.05         | 3.85         | 2.52         |
| NR4A2        | Nuclear receptor subfamily 4, group A, member 2                            | 3.51         | 4.47         | 3.15         | 3.51         |
| PDE4B        | Phosphodiesterase 4B, cAMP-specific                                        | 2.99         | 2.45         | 2.72         | 2.35         |
| PDE4D        | Phosphodiesterase 4D, cAMP-specific                                        | 2.75         | 2.55         | 2.39         | 2.32         |
| EST_AA481397 | AA481397_Exon1_331                                                         | 2.44         | 2.32         | 2.34         | 2.51         |
| FOSB         | FBJ murine osteosarcoma viral oncogene homolog B                           | 2.18         | 3.12         | 1.99         | 1.28         |
| LOC387763    | Hypothetical LOC387763                                                     | 2.36         | 2.11         | 2.07         | 1.66         |
| AREG         | Amphiregulin (schwannoma-derived growth factor)                            | 2.24         | 1.89         | 2.02         | 1.83         |
| SNF1LK       | SNF1-like kinase                                                           | 2.01         | 2.48         | 1.31         | 1.84         |
| ADAMTS5      | ADAM metalloproteinase with thrombospondin type 1 motif, 5 (aggrecanase-2) | 2.33         | 1.80         | 1.61         | 1.79         |
| DACT2        | Dapper, antagonist of beta-catenin, homolog 2                              | 2.42         | 1.64         | 1.74         | 1.71         |
| NTS          | Neurotensin                                                                | 1.99         | 1.97         | 2.03         | 1.17         |
| AVPI1        | Arginine vasopressin-induced protein 1                                     | 2.04         | 1.69         | 2.16         | 1.08         |
| FOS          | V-fos FBJ murine osteosarcoma viral oncogene homolog                       | 1.95         | 1.93         | 1.54         | 1.33         |
| DUSP1        | Dual specificity phosphatase 1                                             | 1.92         | 1.66         | 1.81         | 1.19         |
| PTP4A1       | Protein tyrosine phosphatase type IVA, member 1                            | 1.68         | 1.56         | 1.44         | 1.83         |
| IL11         | Interleukin 11                                                             | 2.25         | 1.46         | 1.65         | 0.96         |
| IRX4         | Iroquois homeobox protein 4                                                | 1.40         | 1.60         | 1.38         | 1.33         |
| CASP9        | Caspase 9, apoptosis-related cysteine peptidase                            | 1.68         | 1.36         | 1.89         | 0.66         |
| CD55         | CD55 antigen, decay accelerating factor for complement                     | 1.94         | 1.12         | 1.07         | 1.40         |
| LYPD3        | LY6/PLAUR domain containing 3                                              | 1.31         | 1.87         | 1.77         | 0.52         |
| GEM          | GTP binding protein overexpressed in skeletal muscle                       | 1.55         | 1.36         | 1.30         | 1.16         |

|               |                                                                           |      |      |      |      |
|---------------|---------------------------------------------------------------------------|------|------|------|------|
| CCK           | Cholecystokinin                                                           | 1.37 | 1.70 | 1.13 | 1.14 |
| RPRM          | Reprimo, TP53 dependent G2 arrest mediator candidate                      | 1.44 | 1.49 | 1.28 | 1.08 |
| ELL2          | Elongation factor, R polymerase II, 2                                     | 1.17 | 1.69 | 1.09 | 1.33 |
| SYAP1         | Synapse associated protein 1, SAP47 homolog                               | 1.32 | 1.47 | 1.39 | 1.10 |
| DKFZp686D0972 | Similar to RIKEN cD 4732495G21 gene                                       | 1.74 | 0.84 | 1.41 | 1.19 |
| DKK1          | Dickkopf homolog 1                                                        | 1.89 | 0.96 | 1.51 | 0.79 |
| RPS9          | Ribosomal protein S9                                                      | 1.06 | 1.36 | 1.91 | 0.77 |
| SLC2A3        | Solute carrier family 2 (facilitated glucose transporter), member 3       | 1.35 | 1.30 | 1.25 | 1.10 |
| RHOB          | Ras homolog gene family, member B                                         | 1.32 | 1.33 | 1.55 | 0.69 |
| EN2           | Engrailed homeobox 2                                                      | 1.41 | 1.26 | 1.03 | 1.07 |
| DUSP2         | Dual specificity phosphatase 2                                            | 1.09 | 1.70 | 1.18 | 0.68 |
| SEMA6A        | Sema domain, transmembrane domain and cytoplasmic domain, (semaphorin) 6A | 1.46 | 1.13 | 1.19 | 0.83 |
| SLC2A14       | Solute carrier family 2 (facilitated glucose transporter), member 14      | 1.11 | 1.13 | 1.31 | 1.00 |
| PTX3          | Pentraxin-related gene, rapidly induced by IL-1 beta                      | 1.09 | 1.18 | 0.82 | 1.19 |
| SOD1          | Superoxide dismutase 1 (amyotrophic lateral sclerosis 1)                  | 1.35 | 0.70 | 1.50 | 0.67 |
| CFC1          | Cripto, FRL-1, cryptic family 1                                           | 1.31 | 1.18 | 1.11 | 0.61 |
| HSPA1A        | Heat shock 70kDa protein 1A                                               | 1.22 | 1.41 | 0.58 | 1.00 |
| TSC22D3       | TSC22 domain family, member 3                                             | 1.39 | 1.05 | 1.13 | 0.63 |
| CHMP1B        | Chromatin modifying protein 1B                                            | 1.32 | 1.08 | 0.89 | 0.85 |
| SGK           | Serum/glucocorticoid regulated kinase                                     | 1.36 | 1.06 | 1.03 | 0.68 |
| HSPB8         | Heat shock 22kDa protein 8                                                | 1.31 | 0.78 | 1.19 | 0.84 |
| FOSL2         | FOS-like antigen 2                                                        | 1.19 | 0.99 | 1.20 | 0.73 |
| JUNB          | Jun B proto-oncogene                                                      | 1.24 | 1.49 | 0.65 | 0.72 |
| MN1           | Meningioma (disrupted in balanced translocation) 1                        | 0.80 | 1.36 | 0.88 | 1.04 |
| GABARAPL1     | GABA(A) receptor-associated protein like 1                                | 1.40 | 0.76 | 1.25 | 0.68 |
| NEDD9         | Neural precursor cell expressed, developmentally down-regulated 9         | 1.52 | 0.94 | 0.86 | 0.72 |
| OLIG2         | Oligodendrocyte lineage transcription factor 2                            | 1.24 | 1.03 | 1.01 | 0.74 |
| AXL           | AXL receptor tyrosine kinase                                              | 1.05 | 0.99 | 0.98 | 0.50 |
| ATP1B3        | ATPase, +/K+ transporting, beta 3 polypeptide                             | 0.83 | 1.71 | 0.78 | 0.70 |

**Supplementary Table 2. Gene Ontology (GO) categories enriched among beta2-adrenoceptor transcriptional target genes.** GO enrichment analysis was carried out with GeneTrail<sup>40</sup>.

| GO Category                                 | <i>p</i> -value | Gene                                                                                                           |
|---------------------------------------------|-----------------|----------------------------------------------------------------------------------------------------------------|
| transcription factor activity               | 0.013           | NR4A1, NR4A3, NR4A2, FOSB, FOS, IRX4, EN2, TSC22D3, FOSL2, JUNB, OLIG2                                         |
| response to cAMP                            | 0.018           | FOS, DUSP1, JUNB                                                                                               |
| glucose transmembrane transporter activity  | 0.018           | SLC2A3, SLC2A14                                                                                                |
| steroid hormone receptor activity           | 0.022           | NR4A1, NR4A3, NR4A2                                                                                            |
| 3',5'-cyclic-AMP phosphodiesterase activity | 0.022           | PDE4B, PDE4D                                                                                                   |
| receptor binding                            | 0.022           | CGA, AREG, ADAMTS5, NTS, IL11, CCK, DKK1, GABARAPL1                                                            |
| MAP kinase phosphatase activity             | 0.022           | DUSP1, DUSP2                                                                                                   |
| response to hormone stimulus                | 0.032           | PCK1, CGA, NR4A3, FOS, DUSP1, JUNB                                                                             |
| growth factor activity                      | 0.036           | AREG, IL11, DKK1                                                                                               |
| regulation of organ growth                  | 0.038           | CGA, SOD1                                                                                                      |
| signal transduction                         | 0.038           | CGA, NR4A1, NR4A2, PDE4B, PDE4D, NTS, FOS, IL11, GEM, CCK, RHOB, DUSP2, SOD1, NEDD9                            |
| cell death                                  | 0.047           | NR4A1, DUSP1, CASP9, CCK, RHOB, SEMA6A, SOD1, TSC22D3, HSPB8, FOSL2                                            |
| multicellular organismal development        | 0.022           | CGA, NR4A3, FOSB, NTS, FOS, PTP4A1, IL11, IRX4, CCK, DKK1, RHOB, EN2, SEMA6A, SLC2A14, SOD1, CFC1, JUNB, OLIG2 |
| GDP binding                                 | 0.018           | PCK1, GEM, RHOB                                                                                                |
| behavior                                    | 0.036           | NR4A3, FOSB, FOS, CCK, SOD1                                                                                    |
| regulation of caspase activity              | 0.038           | NR4A1, CASP9, CCK                                                                                              |
| regulation of membrane potential            | 0.044           | CCK, SOD1, OLIG2                                                                                               |

**Supplementary Table 3. Endocytosis-dependent genes.** Median-centered  $\text{Log}_2(\text{Iso}/\text{No Drug})$  were averaged from  $n = 2$  microarray experiments per condition. Annotated CREB targets are based on Zhang et al. <sup>9</sup>.

**1  $\mu\text{M}$  isoproterenol with or without Dyngo:**

| Gene         | Description                                                               | Average 1 $\mu\text{M}$ Iso | Average 1 $\mu\text{M}$ Iso +Dyngo | CREB Target? |
|--------------|---------------------------------------------------------------------------|-----------------------------|------------------------------------|--------------|
| PCK1         | Phosphoenolpyruvate carboxykinase 1                                       | 5.70                        | 2.15                               | Yes          |
| C6orf176     | Chromosome 6 open reading frame 176                                       | 5.62                        | 4.20                               | Yes          |
| NR4A1        | Nuclear receptor subfamily 4, group A, member 1                           | 4.20                        | 2.41                               | Yes          |
| CGA          | Glycoprotein hormones, alpha polypeptide                                  | 4.40                        | 1.62                               | Yes          |
| NR4A2        | Nuclear receptor subfamily 4, group A, member 2                           | 3.99                        | 1.94                               | Yes          |
| PDE4B        | Phosphodiesterase 4B, cAMP-specific                                       | 2.72                        | 0.83                               | Yes          |
| PDE4D        | Phosphodiesterase 4D, cAMP-specific                                       | 2.65                        | 0.93                               | Yes          |
| EST_AA481397 | AA481397_Exon1_331                                                        | 2.38                        | 0.81                               | NA           |
| DACT2        | Dapper, antagonist of beta-catenin, homolog 2                             | 2.03                        | 0.15                               | NA           |
| LOC387763    | Hypothetical LOC387763                                                    | 2.24                        | 1.07                               | NA           |
| ADAMTS5      | ADAM metallopeptidase with thrombospondin type 1 motif, 5 (aggrecanase-2) | 2.06                        | 0.27                               | Yes          |
| AVPI1        | Arginine vasopressin-induced 1                                            | 1.86                        | 0.52                               | NA           |
| SNF1LK       | SNF1-like kinase                                                          | 2.24                        | 1.00                               | Yes          |
| NTS          | Neurotensin                                                               | 1.98                        | 0.56                               | Yes          |
| FOS          | V-fos FBJ murine osteosarcoma viral oncogene homolog                      | 1.94                        | 0.55                               | Yes          |
| PTP4A1       | Protein tyrosine phosphatase type IVA, member 1                           | 1.62                        | 0.60                               | Yes          |
| CASP9        | Caspase 9, apoptosis-related cysteine peptidase                           | 1.52                        | 0.16                               | Yes          |
| EN2          | Engrailed homeobox 2                                                      | 1.33                        | 0.29                               | Yes          |
| IRX4         | Iroquois homeobox protein 4                                               | 1.50                        | 0.49                               | Yes          |
| TSC22D3      | TSC22 domain family, member 3                                             | 1.22                        | 0.36                               | NA           |
| CCK          | Cholecystokinin                                                           | 1.53                        | 0.76                               | Yes          |
| SGK          | Serum/glucocorticoid regulated kinase                                     | 1.21                        | 0.13                               | Yes          |
| SLC2A3       | Solute carrier family 2 (facilitated glucose transporter), member 3       | 1.32                        | 0.56                               | NA           |
| RHOB         | Ras homolog gene family, member B                                         | 1.33                        | 0.32                               | NA           |
| CHMP1B       | Chromatin modifying protein 1B                                            | 1.20                        | 0.51                               | NA           |
| OLIG2        | Oligodendrocyte lineage transcription factor 2                            | 1.14                        | 0.18                               | NA           |
| JUNB         | Jun B proto-oncogene                                                      | 1.36                        | 0.66                               | Yes          |

|         |                                                                      |      |       |     |
|---------|----------------------------------------------------------------------|------|-------|-----|
| AXL     | AXL receptor tyrosine kinase                                         | 1.02 | -0.01 | NA  |
| FOSL2   | FOS-like antigen 2                                                   | 1.09 | 0.23  | Yes |
| SLC2A14 | Solute carrier family 2 (facilitated glucose transporter), member 14 | 1.12 | 0.56  | NA  |

**10 nM isoproterenol with or without Dyngo:**

| Gene          | Description                                                               | Average<br>10nM Iso | Average 10nM<br>Iso +Dyngo | CREB<br>Target? |
|---------------|---------------------------------------------------------------------------|---------------------|----------------------------|-----------------|
| PCK1          | Phosphoenolpyruvate carboxykinase 1                                       | 4.84                | 1.97                       | Yes             |
| NR4A1         | Nuclear receptor subfamily 4, group A, member 1                           | 3.66                | 0.84                       | Yes             |
| NR4A2         | Nuclear receptor subfamily 4, group A, member 2                           | 3.33                | 0.87                       | Yes             |
| PDE4B         | Phosphodiesterase 4B, cAMP-specific                                       | 2.53                | 1.09                       | Yes             |
| EST_AA481397  | AA481397_Exon1_331                                                        | 2.43                | 0.93                       | NA              |
| PDE4D         | Phosphodiesterase 4D, cAMP-specific                                       | 2.35                | 0.98                       | Yes             |
| AREG          | Amphiregulin (schwannoma-derived growth factor)                           | 1.93                | 0.87                       | Yes             |
| LOC387763     | Hypothetical LOC387763                                                    | 1.86                | 0.74                       | NA              |
| DACT2         | Dapper, antagonist of beta-catenin, homolog 2                             | 1.72                | -0.01                      | NA              |
| ADAMTS5       | ADAM metallopeptidase with thrombospondin type 1 motif, 5 (aggrecanase-2) | 1.70                | 0.39                       | Yes             |
| FOSB          | FBJ murine osteosarcoma viral oncogene homolog B                          | 1.64                | 0.25                       | Yes             |
| PTP4A1        | Protein tyrosine phosphatase type IVA, member 1                           | 1.63                | 0.70                       | Yes             |
| FOS           | V-fos FBJ murine osteosarcoma viral oncogene homolog                      | 1.43                | 0.16                       | Yes             |
| IRX4          | Iroquois homeobox protein 4                                               | 1.36                | 0.59                       | Yes             |
| DKFZp686D0972 | Similar to RIKEN cDNA 4732495G21 gene                                     | 1.30                | 0.39                       | NA              |
| GEM           | GTP binding protein overexpressed in skeletal muscle                      | 1.23                | 0.26                       | Yes             |
| ELL2          | Elongation factor, RNA polymerase II, 2                                   | 1.21                | 0.31                       | Yes             |
| RPRM          | Reprimo, TP53 dependent G2 arrest mediator candidate                      | 1.18                | 0.24                       | NA              |
| SLC2A3        | Solute carrier family 2 (facilitated glucose transporter), member 3       | 1.18                | 0.29                       | NA              |
| SLC2A14       | Solute carrier family 2 (facilitated glucose transporter), member 14      | 1.16                | 0.13                       | NA              |
| CCK           | Cholecystokinin                                                           | 1.13                | 0.50                       | Yes             |
| EN2           | Engrailed homeobox 2                                                      | 1.05                | 0.43                       | Yes             |
| NEDD9         | Neural precursor cell expressed, developmentally down-regulated 9         | 0.79                | 0.16                       | NA              |

**1  $\mu$ M isoproterenol with Dyngo vs 10 nM isoproterenol without Dyngo:**

| Gene          | Description                                                                | Average 10nM Iso | Average 1 $\mu$ M Iso +Dyngo | CREB Target? |
|---------------|----------------------------------------------------------------------------|------------------|------------------------------|--------------|
| PCK1          | Phosphoenolpyruvate carboxykinase 1                                        | 4.84             | 2.15                         | Yes          |
| NR4A1         | Nuclear receptor subfamily 4, group A, member 1                            | 3.66             | 2.41                         | Yes          |
| NR4A2         | Nuclear receptor subfamily 4, group A, member 2                            | 3.33             | 1.94                         | Yes          |
| EST_AA481397  | AA481397_Exon1_331                                                         | 2.43             | 0.81                         | NA           |
| PDE4D         | Phosphodiesterase 4D, cAMP-specific                                        | 2.35             | 0.93                         | Yes          |
| ADAMTS5       | ADAM metalloproteinase with thrombospondin type 1 motif, 5 (aggrecanase-2) | 1.70             | 0.27                         | Yes          |
| PTP4A1        | Protein tyrosine phosphatase type IVA, member 1                            | 1.63             | 0.60                         | Yes          |
| FOS           | V-fos FBJ murine osteosarcoma viral oncogene homolog                       | 1.43             | 0.55                         | Yes          |
| IRX4          | Iroquois homeobox protein 4                                                | 1.36             | 0.49                         | Yes          |
| DKFZp686D0972 | Similar to RIKEN cDNA 4732495G21 gene                                      | 1.30             | 0.50                         | NA           |
| ELL2          | Elongation factor, RNA polymerase II, 2                                    | 1.21             | 0.71                         | Yes          |
| SLC2A3        | Solute carrier family 2 (facilitated glucose transporter), member 3        | 1.18             | 0.56                         | NA           |
| EN2           | Engrailed homeobox 2                                                       | 1.05             | 0.29                         | Yes          |
| CHMP1B        | Chromatin modifying protein 1B                                             | 0.87             | 0.51                         | NA           |

**Supplementary Table 4. Primer sequences used in SYBR Green qPCR analysis.**

| Gene          | Primers (Forward/Reverse)       |                                  |
|---------------|---------------------------------|----------------------------------|
| <i>PCK1</i>   | F: 5'-CTGCCCAAGATCTTCCATGT-3'   | R: 5'-CAGCACCTGGAGTTCTCTC-3'     |
| <i>ACTA</i>   | F: 5'-CTGAGCGTGGCTACTCCTTC-3'   | R: 5'-GCCATCTCGTTCTCGAAGTC-3'    |
| <i>GAPDH</i>  | F: 5'-CAATGACCCCTTCATTGACC-3'   | R: 5'-GACAAGCTTCCCGTTCTCAG-3'    |
| <i>CHC17</i>  | F: 5'-ACTTAGCCGGTGCTGAAGAA-3'   | R: 5'-AACCGACGGATAGTGTCTGG-3'    |
| <i>RHOB</i>   | F: 5'-ACATTGAGGTGGACGGCAAGCA-3' | R: 5'-CTGTCCACCGAGAAGCACATGA-3'  |
| <i>AVP11</i>  | F: 5'-GCCACTCGCTACCACTGCA-3'    | R: 5'-CCTGGCACTTTTCTTCCTAGAGT-3' |
| <i>OLIG2</i>  | F: 5'-ATGCACGACCTCAACATCGCCA-3' | R: 5'-ACCAGTCGCTCCATCTCCTCCA-3'  |
| <i>SLC2A3</i> | F: 5'-TGCCTTTGGCACTCTCAACCAG-3' | R: 5'-GCCATAGCTCTTCAGACCCAAG-3'  |
| <i>AXL</i>    | F: 5'-GTTTGGAGCTGTGATGGAAGGC-3' | R: 5'-CGTTCACTCAGGAAATCCTCC-3'   |

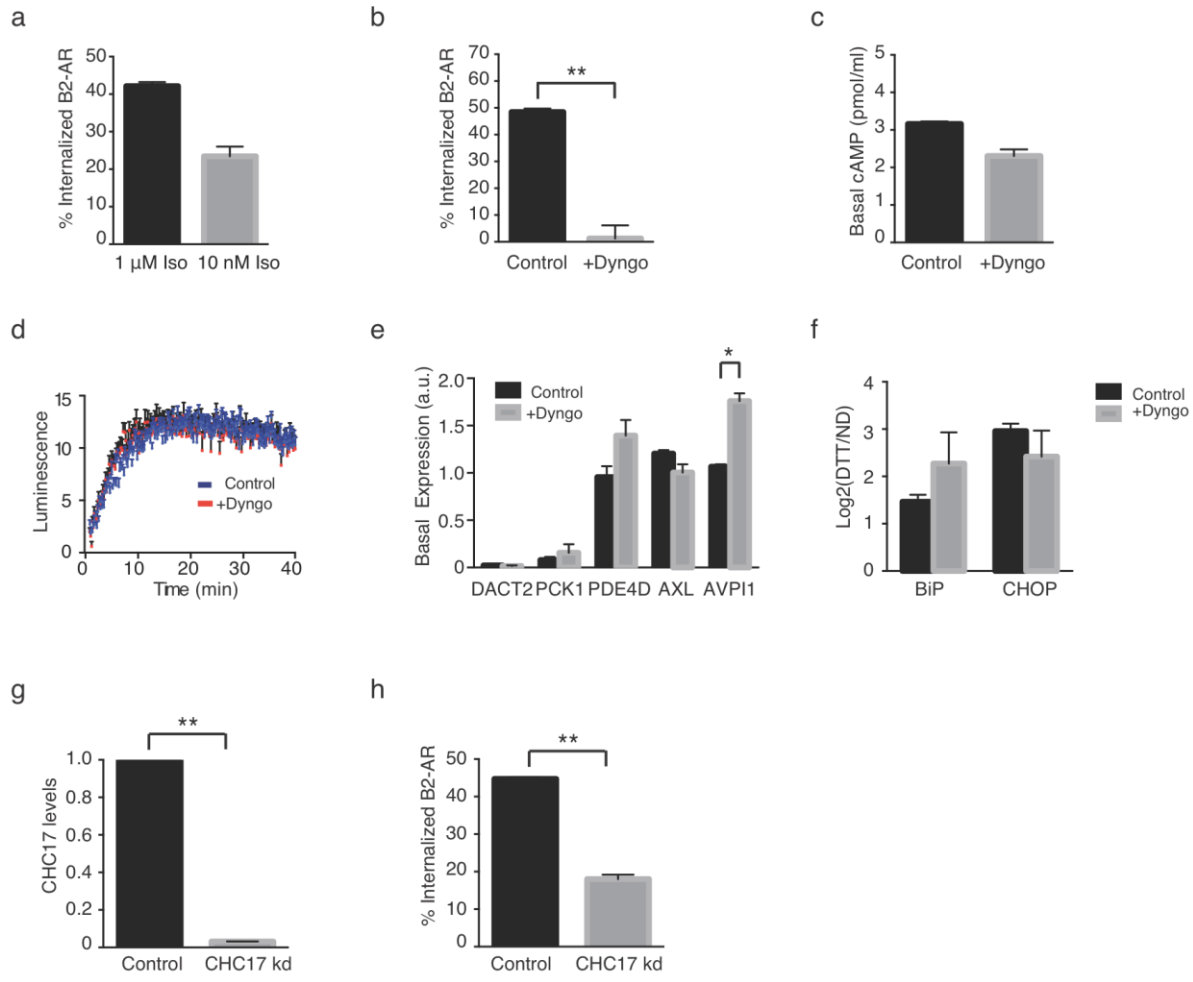



**Supplementary Figure 1. Pharmacological and genetic inhibition of endocytosis. (a-b)** Isoproterenol-induced effects on surface  $\beta$ 2-AR number in cells stably expressing a FLAG epitope-tagged receptor **(a)** after treatment with 1  $\mu$ M or 10 nM isoproterenol or **(b)** in the presence of 30  $\mu$ M Dyngo or vehicle (DMSO) and 1  $\mu$ M isoproterenol as analyzed by flow cytometry. Data = mean surface fluorescence from  $n = 2$ , 10,000 cells/condition, each time point in quadruplicate. **(c)** Basal cAMP levels in cells pre-treated with DMSO or Dyngo were measured using cAMP ELISA kit (Enzo Life Sciences) and normalized to total protein concentration per sample. Data from  $n = 2$ . **(d)** Dyngo treatment does not affect intracellular accumulation of the membrane permeable cAMP analog, 8-bromo-cAMP, added at a final concentration of 300  $\mu$ M. Real-time cAMP measurements were carried out using pGLO-20F (Promega). Data = average from  $n = 3$  experiments. **(e)** Effects of Dyngo on basal gene expression for five  $\beta$ 2-AR transcriptional targets. qPCR measurements for each gene were normalized to expression levels for a housekeeping gene. Data = average from  $n = 2-9$ . **(f)** Dyngo does not block activation of the unfolded protein response genes BiP and CHOP. Cells were pre-treated with 30  $\mu$ M Dyngo or vehicle (DMSO) for 15 min, then 1mM DTT was added for 90 min. Data = average from  $n = 2$  experiments. **(g-h)** Clathrin heavy chain siRNA-mediated knockdown. Cells stably expressing FLAG epitope-tagged  $\beta$ 2-AR were transfected with 20 nM *CHC17* or control siRNA for 72 hrs. **(g)** qRT-PCR analysis of siRNA mediated knockdown of *CHC17*. *CHC17* levels in control-transfected cells were adjusted to 1 for comparison. siRNA knockdown of *CHC17* diminished the mRNA levels by >90%. **(h)** Isoproterenol-induced effects on surface  $\beta$ 2-AR number in *CHC17* or control siRNA transfected cells as analyzed by flow cytometry. Data = mean surface fluorescence for  $n = 2$ , 10,000 cells/condition, each time point in quadruplicate. ND= no drug; Iso = isoproterenol. \*\*  $p < 0.005$ , \*  $p < 0.05$  by unpaired t-test; error bars =  $\pm$  s.e.m.

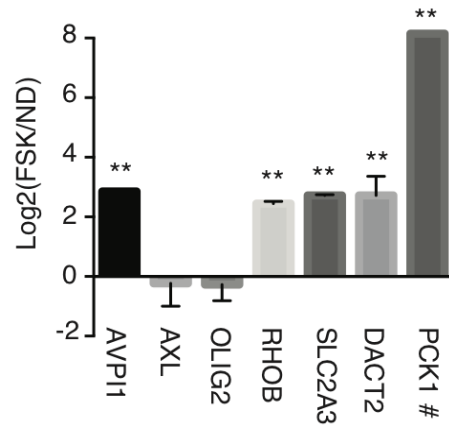

**Supplementary Figure 2. cAMP-dependent transcription of  $\beta$ 2-AR target genes.** Cells were treated with 5  $\mu$ M forskolin (FSK) for 2 hrs and the expression of seven endocytosis-dependent isoproterenol target genes was evaluated by qRT-PCR. Data = averaged log2 ratios (FSK/DMSO) of n = 2-3 experiments  $\pm$  s.e.m. ND = no drug. #- *PCK1* (a known CREB target) is included as positive control. \*\*  $p < 0.005$  by unpaired t-test comparing FSK-induced and basal gene expression levels.

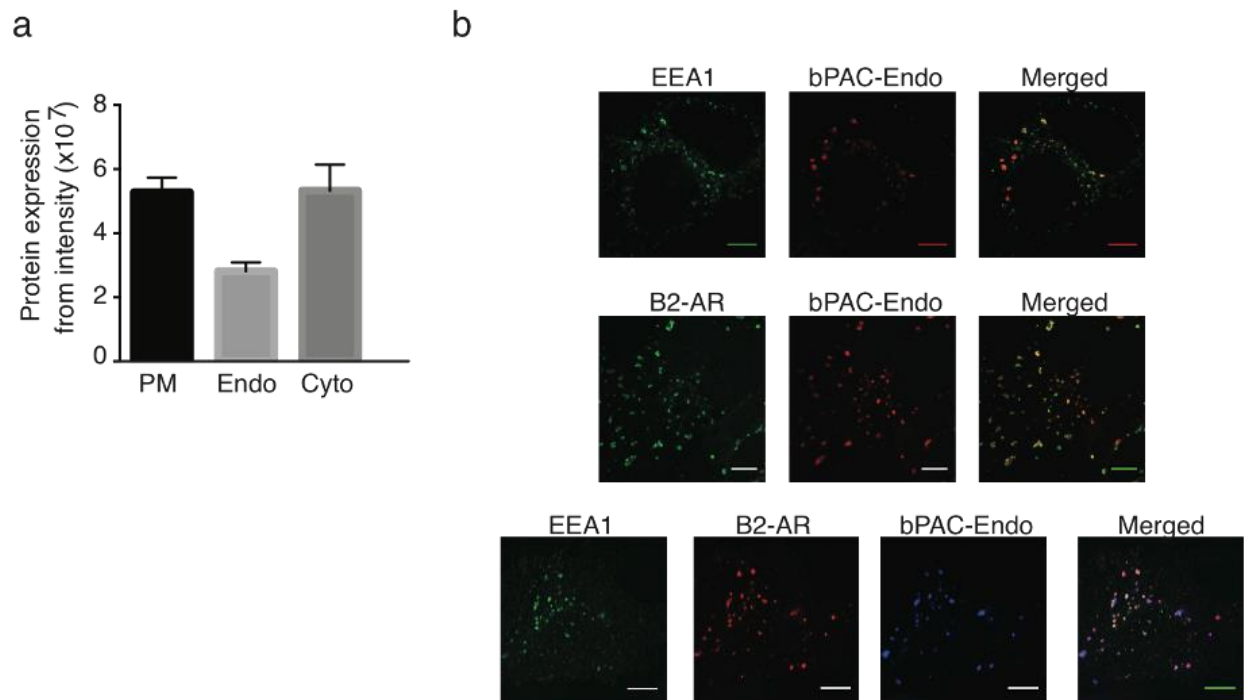

**Supplementary Figure 3. Expression of bPAC constructs in HEK293 cells.** (a) Protein expression from bPAC constructs quantified from immunofluorescence staining. Data = average of  $n = 57$  cells total from 3-4 independent transfections. (b) Co-localization of bPAC-Endo with early endosome marker EEA1 or  $\beta 2$ -AR (after treatment with  $10 \mu\text{M}$  isoproterenol for 15 min) visualized by spinning disk confocal microscopy. Endogenous EEA1 protein was stained with anti-EEA1 antibody, while FLAG-tagged receptor and myc-tagged bPAC-Endo constructs were transiently expressed and stained with Alexa-conjugated antibodies. Scale bar =  $10 \mu\text{m}$ . “Cyto” – cytosolic bPAC, “PM” – Lyn-bPAC, “Endo” – 2xFYVE-bPAC; error bars =  $\pm$  s.e.m.

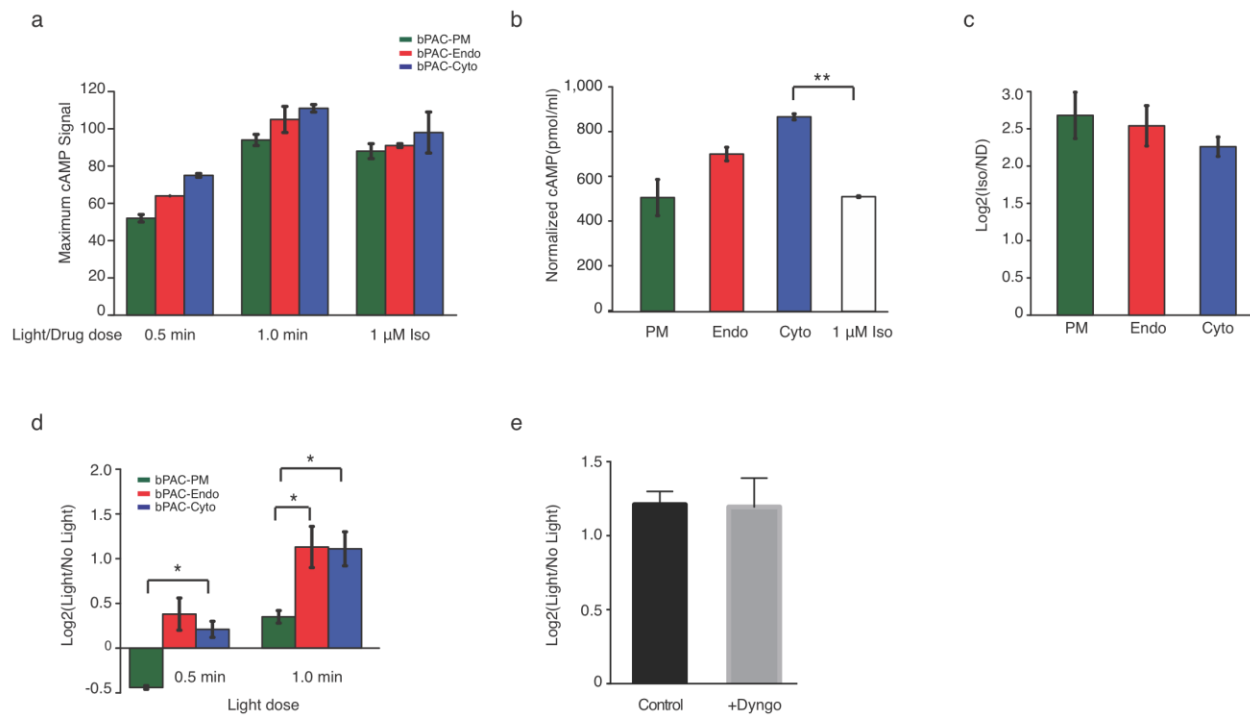

**Supplementary Figure 4. bPAC-dependent signaling.** (a-b) bPAC-transfected cells were exposed to lower doses of light than shown in Figure 4 to generate cAMP levels comparable to 1  $\mu$ M isoproterenol. (a) Maximum cAMP signal in response to low doses of light or bath application of 1  $\mu$ M isoproterenol was measured using the enzyme-based biosensor pGLO-20F (Promega). Data = average from  $n = 2$  experiments, each experiment in triplicate wells of 10,000 cells each. (b) Absolute cAMP levels were measured 5 min after addition of 1  $\mu$ M isoproterenol or after 30 sec of light using cAMP ELISA kit (Enzo Life Sciences) and normalized to total protein concentration. Data = average from  $n = 2$ . (c) GAPDH-normalized *PCK1* expression was measured by qRT-PCR before or after treatment of bPAC-transfected cells with 10 nM isoproterenol for 30 min. Data are average of  $n = 3$ . (d) *PCK1* expression levels were measured by qPCR at indicated doses of light and normalized to *GAPDH*. Data = average from  $n = 2$  (for 0.5 min light) or  $n = 3-4$  (for 1 min light). (e) Pre-treatment of cells with Dyngo does not affect bPAC-Endo-dependent induction of *PCK1* expression at a light dose of 5 min. Data = average from  $n = 2$  experiments. “PM” – Lyn-bPAC, “Endo” – 2xFYVE-bPAC, “Cyto” – cytosolic bPAC, Iso = isoproterenol, ND = no drug. \*\*  $p < 0.005$ , \*  $p < 0.05$  by unpaired t-test; error bars =  $\pm$  s.e.m.

**a**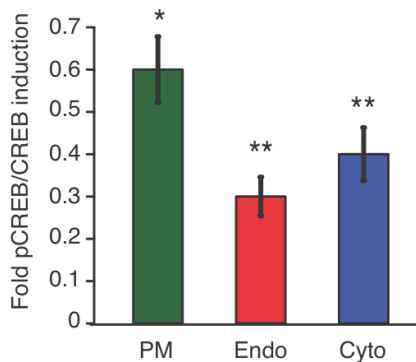**b**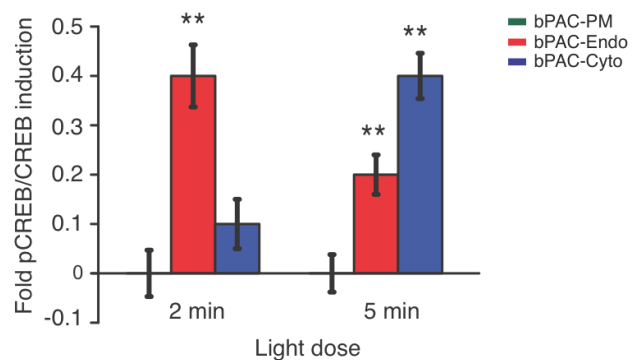

**Supplementary Figure 5. Phosphorylation of CREB.** (a-b) Phosphorylation of CREB was evaluated as a fraction of total CREB by immunofluorescence staining using CREB and phospho-CREB specific antibodies. The ratio of phospho-CREB/CREB in bPAC-transfected cells not exposed to light was set to zero. Cells were (a) treated with 10  $\mu$ M forskolin for 10 min ( $n = 37-41$  cells from 2 independent transfections) or (b) exposed to light at indicated doses ( $n = 40-66$  cells from 2 independent transfections). “PM” – Lyn-bPAC, “Endo” – 2xFYVE-bPAC, “Cyto” – cytosolic bPAC. \*\*  $p < 0.005$ , \*  $p < 0.05$  by unpaired t-test comparing light-induced and basal pCREB levels; error bars =  $\pm$  s.e.m.
